# Supplementary material for: A rapid microwave-assisted synthesis of a sodium–cadmium metal–organic framework having improved performance as a CO2 adsorbent for CCS
Source: Royal Society of Chemistry journal article supplement (doi:10.1039/c5dt00909j), 2015-01-01
Supplement: c5dt00909j1.pdf [file c5dt00909j1.pdf]

## Supplementary information for

### **Rapid microwave-assisted synthesis of a sodium-cadmium metal-organic framework having improved performance as CO<sub>2</sub> adsorbent for CCS**

by

Carlos Palomino Cabello,<sup>a</sup> Carlos Otero Areán,<sup>a</sup> José B. Parra,<sup>b</sup> Conchi O. Ania,<sup>b</sup> P.  
Rumori,<sup>a</sup> and G.Turnes Palomino<sup>a,\*</sup>

<sup>a</sup> *Department of Chemistry, University of the Balearic Islands, 07122 Palma de Mallorca, Spain. Tel.: (+34)-971-173250; Fax: (+34)-971-173426; E-mail: [g.turnes@uib.es](mailto:g.turnes@uib.es)*

<sup>b</sup> *Instituto Nacional del Carbón, INCAR-CSIC, Apdo. 73, 33080 Oviedo, Spain*

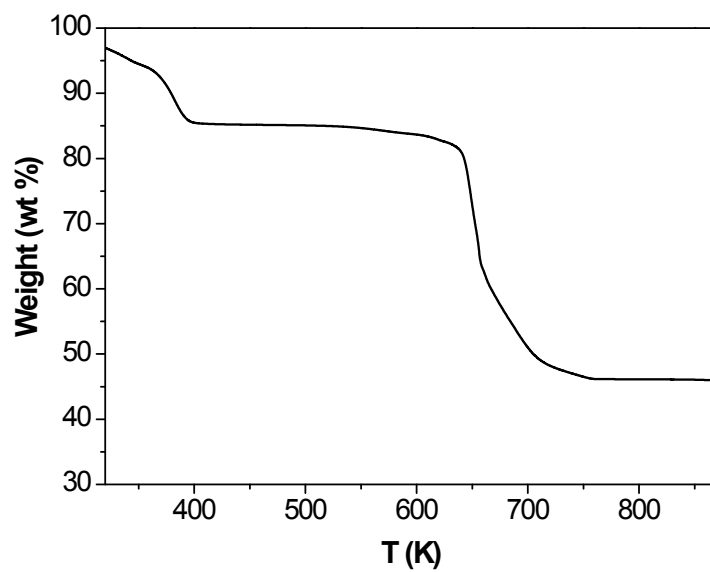

**Fig. S1** TGA curve of the (Na,Cd)-MOF.

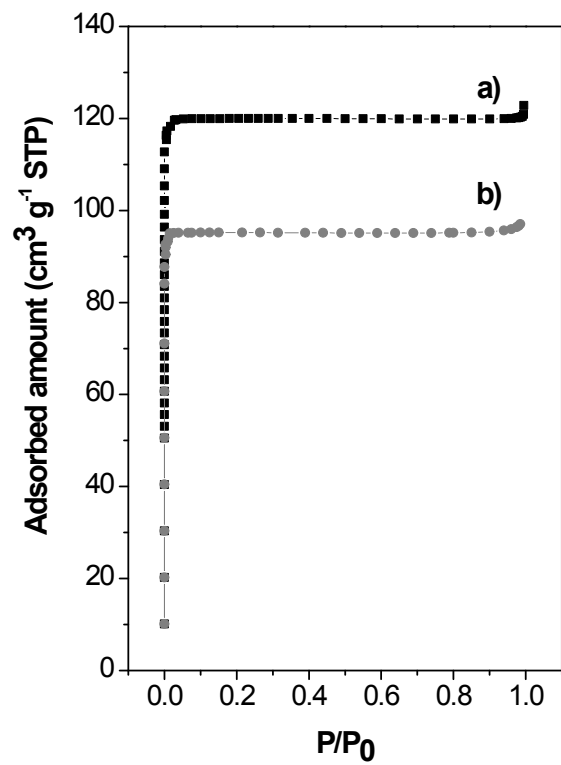

**Fig. S2** Nitrogen adsorption–desorption isotherms at 77 K on the a) (Na,Cd)-MOF and b) (Na,Cd)MOF(CEH).

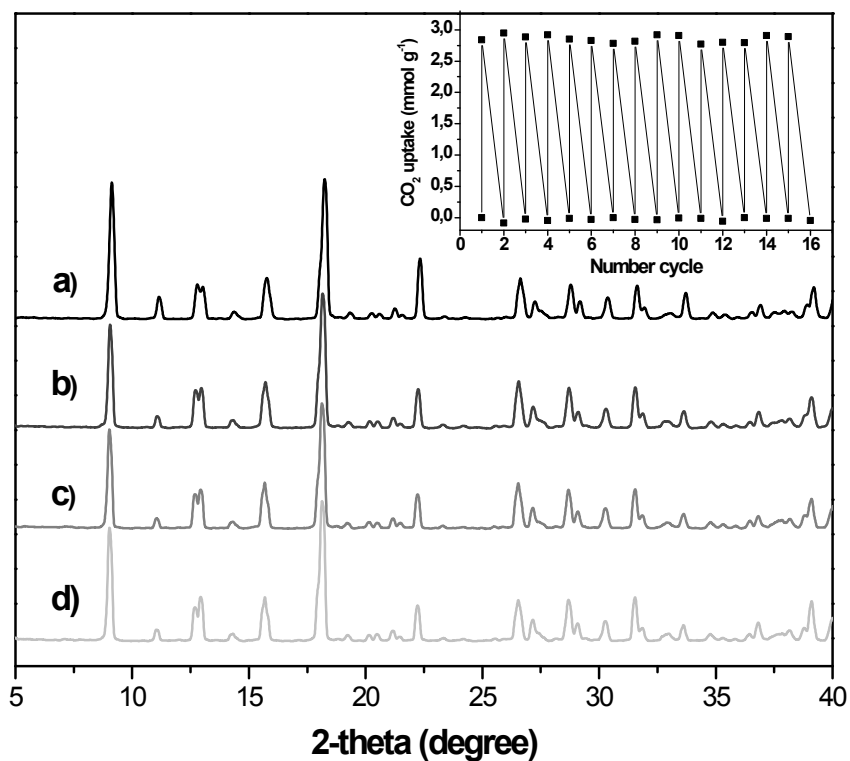

**Fig. S3** X-ray diffraction patterns (Cu-K $\alpha$  radiation) of as-synthesized (Na,Cd)-MOF (a), and after maintaining it under humid air (95% of humidity) during 1 h (b), 1 day (c) and 1 week (d). Inset shows the CO<sub>2</sub> adsorption cycles on the sample kept for one week in humid air (95% of humidity) and reactivated by outgassing at 373 K (repetitive CO<sub>2</sub> adsorption at 308 K followed by desorption at 373 K under a N<sub>2</sub> purge).

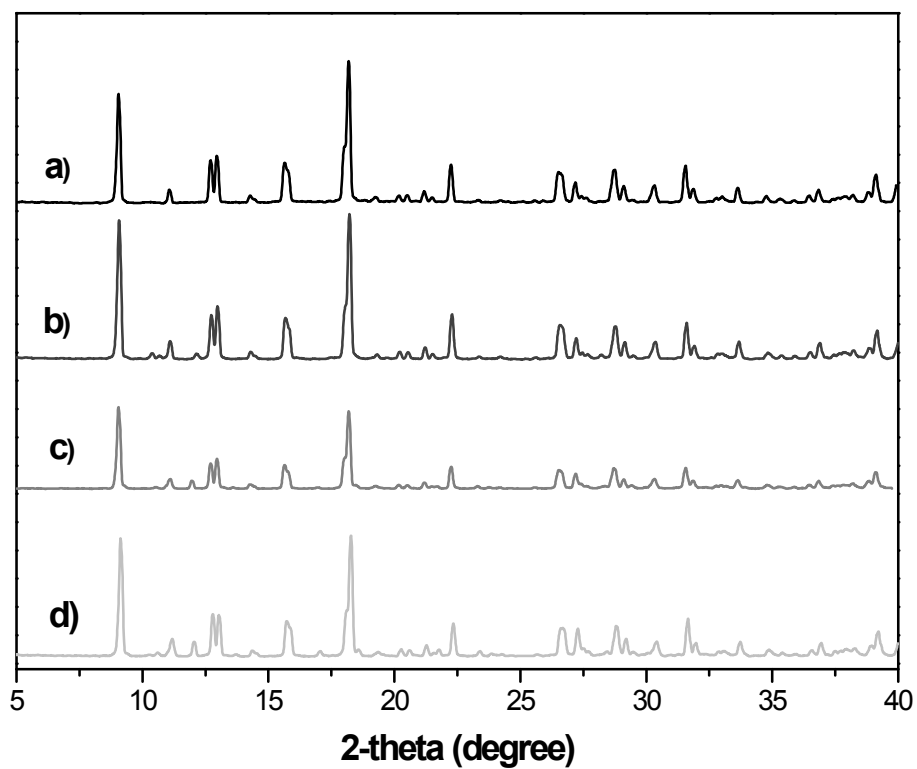

**Fig. S4** X-ray diffraction patterns (Cu-K $\alpha$  radiation) of as-synthesized (Na,Cd)-MOF(CEH) (a), and after maintaining it under humid air (95% of humidity) during 1 h (b), 1 day (c) and 1 week (d).
